# Supplementary material
Source: publisher figshare collection journal article supplement (https://asha.figshare.com/articles/dataset/_/7485647)
Supplement: Supplementary file 1 [file 1]

**Supplemental Material S9.** Correlation of number of accurate/complete (AC) codes across the five discourse tasks.

**Correlations**

|     |                     | CIN    | CR     | PBJ    | RU     | BW     |
|-----|---------------------|--------|--------|--------|--------|--------|
| CIN | Pearson Correlation | 1      | .816** | .776** | .804** | .790** |
|     | Sig. (2-tailed)     |        | .000   | .000   | .000   | .000   |
|     | N                   | 383    | 383    | 383    | 383    | 383    |
| CR  | Pearson Correlation | .816** | 1      | .760** | .807** | .815** |
|     | Sig. (2-tailed)     | .000   |        | .000   | .000   | .000   |
|     | N                   | 383    | 383    | 383    | 383    | 383    |
| PBJ | Pearson Correlation | .776** | .760** | 1      | .772** | .713** |
|     | Sig. (2-tailed)     | .000   | .000   |        | .000   | .000   |
|     | N                   | 383    | 383    | 383    | 383    | 383    |
| RU  | Pearson Correlation | .804** | .807** | .772** | 1      | .778** |
|     | Sig. (2-tailed)     | .000   | .000   | .000   |        | .000   |
|     | N                   | 383    | 383    | 383    | 383    | 383    |
| BW  | Pearson Correlation | .790** | .815** | .713** | .778** | 1      |
|     | Sig. (2-tailed)     | .000   | .000   | .000   | .000   |        |
|     | N                   | 383    | 383    | 383    | 383    | 383    |

\*\* . Correlation is significant at the 0.01 level (2-tailed).

*Note.* CIN = Cinderella; CR = Cat Rescue; PBJ = Sandwich; RU = Refused Umbrella; BW = Broken Window.
