# Supplementary material
Source: publisher figshare collection journal article supplement (https://asha.figshare.com/articles/dataset/_/7485647)
Supplement: Supplementary file 2 [file 1]

**Supplemental Material S7.** Percent overlap of persons not brain injured (PNBIs) with each aphasia subtype (left) and percent overlap of each aphasia subtype with PNBIs (right) for main concept (MC) composite score. NABW= not aphasic by Western Aphasia Battery (WAB).

|                                          | <b>Broken Window</b> | <b>Cinderella</b> | <b>Sandwich</b> | <b>Cat Rescue</b> | <b>Refused Umbrella</b> |
|------------------------------------------|----------------------|-------------------|-----------------|-------------------|-------------------------|
| <b>MC composite</b>                      |                      |                   |                 |                   |                         |
| <b>PNBI/NABW ~ NABW/PNBI</b>             | 70% ~ 100%           | 98% ~ 100%        | 94% ~ 96%       | 98% ~ 96%         | 98% ~ 100%              |
| <b>PNBI/Anomic ~ Anomic/PNBI</b>         | 69% ~ 91%            | 81% ~ 87%         | 100% ~ 91%      | 95% ~ 88%         | 93% ~ 99%               |
| <b>PNBI/Conduction ~ Conduction/PNBI</b> | 70% ~ 91%            | 51% ~ 74%         | 79% ~ 80%       | 61% ~ 78%         | 82% ~ 65%               |
| <b>PNBI/Wernicke's ~ Wernicke's/PNBI</b> | 45% ~ 63%            | 13% ~ 58%         | 40% ~ 58%       | 31% ~ 47%         | 19% ~ 58%               |
| <b>PNBI/Broca's --- Broca's/PNBI</b>     | 23% ~ 52%            | 23% ~ 43%         | 21% ~ 54%       | 7% ~ 40%          | 21% ~ 23%               |
| <b>Accurate/Complete</b>                 |                      |                   |                 |                   |                         |
| <b>PNBI/NABW ~ NABW/PNBI</b>             | 73% ~ 100%           | 96% ~ 96%         | 94% ~ 96%       | 99% ~ 92%         | 99% ~ 100%              |
| <b>PNBI/Anomic ~ Anomic/PNBI</b>         | 74% ~ 80%            | 83% ~ 77%         | 100% ~ 71%      | 95% ~ 72%         | 97% ~ 86%               |
| <b>PNBI/Conduction ~ Conduction/PNBI</b> | 74% ~ 61%            | 26% ~ 50%         | 87% ~ 41%       | 52% ~ 41%         | 97% ~ 72%               |
| <b>PNBI/Wernicke's ~ Wernicke's/PNBI</b> | 3% ~ 53%             | 6% ~ 26%          | 12% ~ 16%       | 2% ~ 15%          | 5% ~ 68%                |
| <b>PNBI/Broca's --- Broca's/PNBI</b>     | 13% ~ 13%            | 5% ~ 8%           | 7% ~ 7%         | <1% ~ <1%         | 5% ~ 20%                |
| <b>Accurate/Incomplete</b>               |                      |                   |                 |                   |                         |
| <b>PNBI/NABW ~ NABW/PNBI</b>             | 100% ~ 92%           | 100% ~ 88%        | 100% ~ 96%      | 100% ~ 100%       | 99% ~ 100%              |
| <b>PNBI/Anomic ~ Anomic/PNBI</b>         | 100% ~ 69%           | 100% ~ 74%        | 100% ~ 91%      | 100% ~ 91%        | 100% ~ 99%              |
| <b>PNBI/Conduction ~ Conduction/PNBI</b> | 100% ~ 54%           | 100% ~ 65%        | 100% ~ 87%      | 100% ~ 71%        | 100% ~ 91%              |
| <b>PNBI/Wernicke's ~ Wernicke's/PNBI</b> | 100% ~ 63%           | 100% ~ 63%        | 100% ~ 95%      | 100% ~ 78%        | 100% ~ 79%              |
| <b>PNBI/Broca's --- Broca's/PNBI</b>     | 100% ~ 51%           | 100% ~ 77%        | 100% ~ 80%      | 100% ~ 70%        | 100% ~ 74%              |
| <b>Inaccurate/Complete</b>               |                      |                   |                 |                   |                         |
| <b>PNBI/NABW ~ NABW/PNBI</b>             | 99% ~ 100%           | 100% ~ 100%       | 99% ~ 100%      | 99% ~ 100%        | 99% ~ 100%              |
| <b>PNBI/Anomic ~ Anomic/PNBI</b>         | 100% ~ 95%           | 100% ~ 97%        | 100% ~ 100%     | 100% ~ 98%        | 99% ~ 100%              |
| <b>PNBI/Conduction ~ Conduction/PNBI</b> | 10% ~ 96%            | 100% ~ 91%        | 100% ~ 98%      | 99% ~ 100%        | 99% ~ 100%              |
| <b>PNBI/Wernicke's ~ Wernicke's/PNBI</b> | 100% ~ 89%           | 100% ~ 95%        | 99% ~ 100%      | 99% ~ 100%        | 99% ~ 100%              |
| <b>PNBI/Broca's --- Broca's/PNBI</b>     | 100% ~ 100%          | 99% ~ 100%        | 99% ~ 100%      | 99% ~ 100%        | 99% ~ 100%              |
| <b>Inaccurate/Incomplete</b>             |                      |                   |                 |                   |                         |
| <b>PNBI/NABW ~ NABW/PNBI</b>             | 100% ~ 100%          | 100% ~ 92%        | 100% ~ 100%     | 99% ~ 100%        | 100% ~ 100%             |
| <b>PNBI/Anomic ~ Anomic/PNBI</b>         | 100% ~ 91%           | 100% ~ 84%        | 100% ~ 93%      | 100% ~ 100%       | 100% ~ 93%              |
| <b>PNBI/Conduction ~ Conduction/PNBI</b> | 100% ~ 93%           | 100% ~ 52%        | 100% ~ 74%      | 100% ~ 95%        | 100% ~ 52%              |
| <b>PNBI/Wernicke's ~ Wernicke's/PNBI</b> | 100% ~ 74%           | 100% ~ 79%        | 100% ~ 95%      | 100% ~ 94%        | 100% ~ 84%              |
| <b>PNBI/Broca's --- Broca's/PNBI</b>     | 100% ~ 70%           | 99% ~ 85%         | 100% ~ 82%      | 100% ~ 98%        | 100% ~ 85%              |
| <b>Absent</b>                            |                      |                   |                 |                   |                         |
| <b>PNBI/NABW ~ NABW/PNBI</b>             | 100% ~ 100%          | 99% ~ 100%        | 99% ~ 100%      | 98% ~ 100%        | 98% ~ 100%              |
| <b>PNBI/Anomic ~ Anomic/PNBI</b>         | 91% ~ 98%            | 87% ~ 94%         | 100% ~ 99%      | 98% ~ 93%         | 93% ~ 83%               |
| <b>PNBI/Conduction ~ Conduction/PNBI</b> | 91% ~ 96%            | 82% ~ 85%         | 77% ~ 93%       | 84% ~ 100%        | 93% ~ 89%               |
| <b>PNBI/Wernicke's ~ Wernicke's/PNBI</b> | 100% ~ 79%           | 36% ~ 68%         | 77% ~ 74%       | 84% ~ 57%         | 63% ~ 74%               |
| <b>PNBI/Broca's --- Broca's/PNBI</b>     | 43% ~ 72%            | 48% ~ 56%         | 92% ~ 75%       | 58% ~ 63%         | 63% ~ 60%               |
| <b>MC attempts</b>                       |                      |                   |                 |                   |                         |
| <b>PNBI/NABW ~ NABW/PNBI</b>             | 100% ~ 100%          | 99% ~ 100%        | 99% ~ 100%      | 98% ~ 100%        | 98% ~ 100%              |
| <b>PNBI/Anomic ~ Anomic/PNBI</b>         | 91% ~ 98%            | 82% ~ 99%         | 100% ~ 98%      | 98% ~ 93%         | 93% ~ 83%               |
| <b>PNBI/Conduction ~ Conduction/PNBI</b> | 91% ~ 96%            | 82% ~ 91%         | 77% ~ 93%       | 84% ~ 100%        | 93% ~ 89%               |
| <b>PNBI/Wernicke's ~ Wernicke's/PNBI</b> | 100% ~ 79%           | 36% ~ 74%         | 77% ~ 74%       | 84% ~ 57%         | 63% ~ 74%               |
| <b>PNBI/Broca's --- Broca's/PNBI</b>     | 43% ~ 72%            | 48% ~ 66%         | 77% ~ 74%       | 58% ~ 63%         | 63% ~ 60%               |
