# Supplementary material
Source: publisher figshare collection journal article supplement (https://asha.figshare.com/articles/dataset/_/7485647)
Supplement: Supplementary file 3 [file 1]

**Supplemental Material S6.** Comparison median tests comparing all individuals with Broca's aphasia to all controls for the five discourse tasks.<sup>†</sup>

|                         |              | <b>Median Test</b><br><b>(<math>\chi^2</math>)</b> | <b>Phi Coefficient</b><br><b>(<math>\phi</math>)</b> | <b>Phi (<math>\phi</math>)</b><br><b>Magnitude</b> |
|-------------------------|--------------|----------------------------------------------------|------------------------------------------------------|----------------------------------------------------|
| <b>Broken Window</b>    | MC Composite | 97.124                                             | .687                                                 | Large                                              |
|                         | MC Attempts  | 76.181                                             | .608                                                 | Large                                              |
|                         | AC           | 136.493                                            | .814                                                 | Large                                              |
|                         | AI           | 115.52                                             | .749                                                 | Large                                              |
|                         | IC           | 4.121 <sup>T</sup>                                 | .141                                                 | Small                                              |
|                         | II           | 46.884                                             | .477                                                 | Medium                                             |
|                         | AB           | 64.522                                             | .56                                                  | Large                                              |
| <b>Cinderella</b>       | MC Composite | 129.274                                            | .792                                                 | Large                                              |
|                         | MC Attempts  | 111.905                                            | .737                                                 | Large                                              |
|                         | AC           | 168.372                                            | .904                                                 | Large                                              |
|                         | AI           | 28.835                                             | .374                                                 | Medium                                             |
|                         | IC           | 11.356                                             | .235                                                 | Small                                              |
|                         | II           | 45.597                                             | .47                                                  | Medium                                             |
|                         | AB           | 117.977                                            | .757                                                 | Large                                              |
| <b>Sandwich</b>         | MC Composite | 107.445                                            | .722                                                 | Large                                              |
|                         | MC Attempts  | 54.581                                             | .515                                                 | Large                                              |
|                         | AC           | 139.318                                            | .822                                                 | Large                                              |
|                         | AI           | 50.428                                             | .495                                                 | Medium                                             |
|                         | IC           | 1.544 <sup>NS</sup>                                | .087                                                 | Not Significant                                    |
|                         | II           | 68.405                                             | .576                                                 | Large                                              |
|                         | AB           | 76.608                                             | .61                                                  | Large                                              |
| <b>Cat Rescue</b>       | MC Composite | 125.866                                            | .782                                                 | Large                                              |
|                         | MC Attempts  | 81.072                                             | .627                                                 | Large                                              |
|                         | AC           | 139.318                                            | .822                                                 | Large                                              |
|                         | AI           | 58.786                                             | .534                                                 | Large                                              |
|                         | IC           | 8.394                                              | .202                                                 | Small                                              |
|                         | II           | 18.389                                             | .379                                                 | Medium                                             |
|                         | AB           | 117.567                                            | .755                                                 | Large                                              |
| <b>Refused Umbrella</b> | MC Composite | 118.995                                            | .76                                                  | Large                                              |
|                         | MC Attempts  | 112.938                                            | .74                                                  | Large                                              |
|                         | AC           | 142.215                                            | .831                                                 | Large                                              |
|                         | AI           | 51.703                                             | .501                                                 | Large                                              |
|                         | IC           | 1.919 <sup>NS</sup>                                | .166                                                 | Small                                              |
|                         | II           | 22.371                                             | .33                                                  | Medium                                             |
|                         | AB           | 144.913                                            | .839                                                 | Large                                              |

Notes. MC = main concept; AC = accurate/complete; AI = accurate/incomplete; IC = inaccurate/complete; II = inaccurate/incomplete; AB= absent.

<sup>†</sup>Comparisons are significant at  $p < .001$  unless noted otherwise.

<sup>NS</sup> $p > .05$ . <sup>T</sup>Nonsignificant with Holm-Bonferroni correction.
