# Supplementary material
Source: publisher figshare collection journal article supplement (https://asha.figshare.com/articles/dataset/_/7485647)
Supplement: Supplementary file 4 [file 1]

**Supplemental Material S14.** Correlation of number of main concept (MC) attempts across the five discourse tasks.

**Correlations**

|     |                     | CIN    | CR     | PBJ    | RU     | BW     |
|-----|---------------------|--------|--------|--------|--------|--------|
| CIN | Pearson Correlation | 1      | .669** | .603** | .695** | .614** |
|     | Sig. (2-tailed)     |        | .000   | .000   | .000   | .000   |
|     | N                   | 383    | 383    | 383    | 383    | 383    |
| CR  | Pearson Correlation | .669** | 1      | .525** | .695** | .654** |
|     | Sig. (2-tailed)     | .000   |        | .000   | .000   | .000   |
|     | N                   | 383    | 383    | 383    | 383    | 383    |
| PBJ | Pearson Correlation | .603** | .525** | 1      | .565** | .449** |
|     | Sig. (2-tailed)     | .000   | .000   |        | .000   | .000   |
|     | N                   | 383    | 383    | 383    | 383    | 383    |
| RU  | Pearson Correlation | .695** | .695** | .565** | 1      | .614** |
|     | Sig. (2-tailed)     | .000   | .000   | .000   |        | .000   |
|     | N                   | 383    | 383    | 383    | 383    | 383    |
| BW  | Pearson Correlation | .614** | .654** | .449** | .614** | 1      |
|     | Sig. (2-tailed)     | .000   | .000   | .000   | .000   |        |
|     | N                   | 383    | 383    | 383    | 383    | 383    |

\*\* . Correlation is significant at the 0.01 level (2-tailed).

*Note.* CIN = Cinderella; CR = Cat Rescue; PBJ = Sandwich; RU = Refused Umbrella; BW = Broken Window.
