# Supplementary material
Source: publisher figshare collection journal article supplement (https://asha.figshare.com/articles/dataset/_/7485647)
Supplement: Supplementary file 5 [file 1]

**Supplemental Material S5.** Comparison median tests comparing all individuals with Wernicke's aphasia to all controls for the five discourse tasks.<sup>†</sup>

|                         |              | <b>Median Test</b>           | <b>Phi Coefficient</b>     | <b>Phi (<math>\phi</math>)</b> |
|-------------------------|--------------|------------------------------|----------------------------|--------------------------------|
|                         |              | <b>(<math>\chi^2</math>)</b> | <b>(<math>\phi</math>)</b> | <b>Magnitude</b>               |
| <b>Broken Window</b>    | MC Composite | 29.266                       | .422                       | Medium                         |
|                         | MC Attempts  | 14.591                       | .298                       | Small                          |
|                         | AC           | 71.255                       | .659                       | Large                          |
|                         | AI           | 48.902                       | .546                       | Large                          |
|                         | IC           | 28.455                       | .417                       | Medium                         |
|                         | II           | 39.358                       | .49                        | Medium                         |
|                         | AB           | 26.822                       | .404                       | Medium                         |
| <b>Cinderella</b>       | MC Composite | 68.877                       | .648                       | Large                          |
|                         | MC Attempts  | 32.09                        | .442                       | Medium                         |
|                         | AC           | 104.378                      | .798                       | Large                          |
|                         | AI           | 12.534                       | .276                       | Small                          |
|                         | IC           | 1.211 <sup>NS</sup>          | .086                       | Not Significant                |
|                         | II           | 44.87                        | .523                       | Large                          |
|                         | AB           | 40.747                       | .498                       | Medium                         |
| <b>Sandwich</b>         | MC Composite | 45.894                       | .529                       | Large                          |
|                         | MC Attempts  | 25.821                       | .397                       | Medium                         |
|                         | AC           | 73.762                       | .671                       | Large                          |
|                         | AI           | 32.193                       | .443                       | Medium                         |
|                         | IC           | 0.056 <sup>NS</sup>          | .018                       | Not Significant                |
|                         | II           | 56.779                       | .588                       | Large                          |
|                         | AB           | 45.894                       | .529                       | Large                          |
| <b>Cat Rescue</b>       | MC Composite | 55.738                       | .583                       | Large                          |
|                         | MC Attempts  | 25.909                       | .397                       | Medium                         |
|                         | AC           | 73.762                       | .671                       | Large                          |
|                         | AI           | 21.314                       | .361                       | Medium                         |
|                         | IC           | 17.974                       | .331                       | Medium                         |
|                         | II           | 23.566                       | .379                       | Medium                         |
|                         | AB           | 52.693                       | .567                       | Large                          |
| <b>Refused Umbrella</b> | MC Composite | 53.902                       | .573                       | Large                          |
|                         | MC Attempts  | 32.148                       | .443                       | Medium                         |
|                         | AC           | 76.408                       | .683                       | Large                          |
|                         | AI           | 16.618                       | .318                       | Medium                         |
|                         | IC           | 26.822                       | .404                       | Medium                         |
|                         | II           | 23.321                       | .377                       | Medium                         |
|                         | AB           | 59.534                       | .603                       | Large                          |

Notes. MC = main concept; AC = accurate/complete; AI = accurate/incomplete; IC = inaccurate/complete; II = inaccurate/incomplete; AB= absent.

<sup>†</sup>Comparisons are significant at  $p < .001$  unless noted otherwise.

<sup>NS</sup> $p > .05$ .
