# Supplementary material
Source: publisher figshare collection journal article supplement (https://asha.figshare.com/articles/dataset/_/7485647)
Supplement: Supplementary file 6 [file 1]

**Supplemental Material S11.** Correlation of number of inaccurate/complete (IC) codes across the five discourse tasks.

|     |                     | <b>Correlations</b> |        |        |        |        |
|-----|---------------------|---------------------|--------|--------|--------|--------|
|     |                     | CIN                 | CR     | PBJ    | RU     | BW     |
| CIN | Pearson Correlation | 1                   | .259** | .273** | .226** | .277** |
|     | Sig. (2-tailed)     |                     | .000   | .000   | .000   | .000   |
|     | N                   | 383                 | 383    | 383    | 383    | 383    |
| CR  | Pearson Correlation | .259**              | 1      | .207** | .217** | .255** |
|     | Sig. (2-tailed)     | .000                |        | .000   | .000   | .000   |
|     | N                   | 383                 | 383    | 383    | 383    | 383    |
| PBJ | Pearson Correlation | .273**              | .207** | 1      | .161** | .145** |
|     | Sig. (2-tailed)     | .000                | .000   |        | .002   | .005   |
|     | N                   | 383                 | 383    | 383    | 383    | 383    |
| RU  | Pearson Correlation | .226**              | .217** | .161** | 1      | .227** |
|     | Sig. (2-tailed)     | .000                | .000   | .002   |        | .000   |
|     | N                   | 383                 | 383    | 383    | 383    | 383    |
| BW  | Pearson Correlation | .277**              | .255** | .145** | .227** | 1      |
|     | Sig. (2-tailed)     | .000                | .000   | .005   | .000   |        |
|     | N                   | 383                 | 383    | 383    | 383    | 383    |

\*\* . Correlation is significant at the 0.01 level (2-tailed).

*Note.* CIN = Cinderella; CR = Cat Rescue; PBJ = Sandwich; RU = Refused Umbrella; BW = Broken Window.
