# Supplementary material
Source: publisher figshare collection journal article supplement (https://asha.figshare.com/articles/dataset/_/7485647)
Supplement: Supplementary file 7 [file 1]

**Supplemental Material S12.** Correlation of number of inaccurate/incomplete (II) codes across the five discourse tasks.

**Correlations**

|     |                     | CIN    | CR     | PBJ    | RU     | BW     |
|-----|---------------------|--------|--------|--------|--------|--------|
| CIN | Pearson Correlation | 1      | .221** | .267** | .270** | .119*  |
|     | Sig. (2-tailed)     |        | .000   | .000   | .000   | .020   |
|     | N                   | 383    | 383    | 383    | 383    | 383    |
| CR  | Pearson Correlation | .221** | 1      | .262** | .212** | .218** |
|     | Sig. (2-tailed)     | .000   |        | .000   | .000   | .000   |
|     | N                   | 383    | 383    | 383    | 383    | 383    |
| PBJ | Pearson Correlation | .267** | .262** | 1      | .053   | .153** |
|     | Sig. (2-tailed)     | .000   | .000   |        | .299   | .003   |
|     | N                   | 383    | 383    | 383    | 383    | 383    |
| RU  | Pearson Correlation | .270** | .212** | .053   | 1      | .045   |
|     | Sig. (2-tailed)     | .000   | .000   | .299   |        | .377   |
|     | N                   | 383    | 383    | 383    | 383    | 383    |
| BW  | Pearson Correlation | .119*  | .218** | .153** | .045   | 1      |
|     | Sig. (2-tailed)     | .020   | .000   | .003   | .377   |        |
|     | N                   | 383    | 383    | 383    | 383    | 383    |

\*\* . Correlation is significant at the 0.01 level (2-tailed).

\* . Correlation is significant at the 0.05 level (2-tailed).

*Note.* CIN = Cinderella; CR = Cat Rescue; PBJ = Sandwich; RU = Refused Umbrella; BW = Broken Window.
