# Supplementary material
Source: publisher figshare collection journal article supplement (https://asha.figshare.com/articles/dataset/_/7485647)
Supplement: Supplementary file 8 [file 1]

**Supplemental Material S2.** Comparison median tests comparing all individuals not aphasic by Western Aphasia Battery (NABW) to all controls for the five discourse tasks.<sup>†</sup>

|                         |              | <b>Median Test</b><br><b>(<math>\chi^2</math>)</b> | <b>Phi</b><br><b>Coefficient (<math>\phi</math>)</b> | <b>Phi (<math>\phi</math>)</b><br><b>Magnitude</b> |
|-------------------------|--------------|----------------------------------------------------|------------------------------------------------------|----------------------------------------------------|
| <b>Broken Window</b>    | MC Composite | 7.798 <sup>**</sup>                                | .214                                                 | Small                                              |
|                         | MC Attempts  | 6.387 <sup>T</sup>                                 | .193                                                 | Small                                              |
|                         | AC           | 7.451 <sup>**</sup>                                | .209                                                 | Small                                              |
|                         | AI           | 18.619                                             | .33                                                  | Medium                                             |
|                         | IC           | 5.128 <sup>T</sup>                                 | .173                                                 | Small                                              |
|                         | II           | N/A                                                | N/A                                                  | N/A                                                |
|                         | AB           | 2.852 <sup>NS</sup>                                | .129                                                 | Small                                              |
| <b>Cinderella</b>       | MC Composite | 1.474 <sup>NS</sup>                                | .093                                                 | Not Significant                                    |
|                         | MC Attempts  | 5.119 <sup>T</sup>                                 | .173                                                 | Small                                              |
|                         | AC           | 4.975 <sup>T</sup>                                 | .171                                                 | Small                                              |
|                         | AI           | 35.967                                             | .459                                                 | Medium                                             |
|                         | IC           | 2.281 <sup>NS</sup>                                | .116                                                 | Small                                              |
|                         | II           | 5.065 <sup>T</sup>                                 | .172                                                 | Small                                              |
|                         | AB           | 1.225 <sup>T</sup>                                 | .085                                                 | Not Significant                                    |
| <b>Sandwich</b>         | MC Composite | 0.008 <sup>NS</sup>                                | .007                                                 | Not Significant                                    |
|                         | MC Attempts  | 1.468 <sup>NS</sup>                                | .093                                                 | Not Significant                                    |
|                         | AC           | 3.718 <sup>NS</sup>                                | .147                                                 | Small                                              |
|                         | AI           | 6.884 <sup>T</sup>                                 | .201                                                 | Small                                              |
|                         | IC           | 0.174 <sup>NS</sup>                                | .032                                                 | Not Significant                                    |
|                         | II           | 3.846 <sup>T</sup>                                 | .15                                                  | Small                                              |
|                         | AB           | 0.302 <sup>NS</sup>                                | .042                                                 | Not Significant                                    |
| <b>Cat Rescue</b>       | MC Composite | 5.097 <sup>T</sup>                                 | .173                                                 | Small                                              |
|                         | MC Attempts  | 5.806 <sup>T</sup>                                 | .184                                                 | Small                                              |
|                         | AC           | 10.924                                             | .253                                                 | Small                                              |
|                         | AI           | 0.046 <sup>NS</sup>                                | .016                                                 | Not Significant                                    |
|                         | IC           | 26.510                                             | .394                                                 | Medium                                             |
|                         | II           | .180 <sup>NS</sup>                                 | .032                                                 | Not Significant                                    |
|                         | AB           | 5.761 <sup>T</sup>                                 | .184                                                 | Small                                              |
| <b>Refused Umbrella</b> | MC Composite | 2.93 <sup>NS</sup>                                 | .131                                                 | Small                                              |
|                         | MC Attempts  | 1.865 <sup>NS</sup>                                | .104                                                 | Small                                              |
|                         | AC           | 2.441 <sup>NS</sup>                                | .119                                                 | Small                                              |
|                         | AI           | 0.638 <sup>NS</sup>                                | .061                                                 | Not Significant                                    |
|                         | IC           | 7.117 <sup>T</sup>                                 | .204                                                 | Small                                              |
|                         | II           | N/A                                                | N/A                                                  | N/A                                                |
|                         | AB           | 0.123 <sup>NS</sup>                                | .027                                                 | Not Significant                                    |

Notes. MC = main concept; AC = accurate/complete; AI = accurate/incomplete; IC = inaccurate/complete; II = inaccurate/incomplete; AB= absent.

<sup>†</sup>Comparisons are significant at  $p < .001$  unless noted otherwise.

<sup>\*\*</sup> $p < .01$ . <sup>NS</sup> $p > .05$ . <sup>T</sup>Nonsignificant with Holm-Bonferroni correction.
