# Supplementary material
Source: publisher figshare collection journal article supplement (https://asha.figshare.com/articles/dataset/_/7485647)
Supplement: Supplementary file 9 [file 1]

**Supplemental Material S1.** Median tests results comparing all persons with aphasia to all controls for the five discourse tasks.<sup>†</sup>

|                         |              | <b>Median Test</b><br><b>(<math>\chi^2</math>)</b> | <b>Phi Coefficient</b><br><b>(<math>\phi</math>)</b> | <b>Phi (<math>\phi</math>)</b><br><b>Magnitude</b> |
|-------------------------|--------------|----------------------------------------------------|------------------------------------------------------|----------------------------------------------------|
| <b>Broken Window</b>    | MC Composite | 119.966                                            | .56                                                  | Large                                              |
|                         | MC Attempts  | 72.164                                             | .434                                                 | Medium                                             |
|                         | AC           | 164.041                                            | .654                                                 | Large                                              |
|                         | AI           | 126.468                                            | .575                                                 | Large                                              |
|                         | IC           | 40.238                                             | .324                                                 | Medium                                             |
|                         | II           | 22.732                                             | .244                                                 | Small                                              |
|                         | AB           | 47.563                                             | .352                                                 | Medium                                             |
| <b>Cinderella</b>       | MC Composite | 128.655                                            | .58                                                  | Large                                              |
|                         | MC Attempts  | 98.97                                              | .508                                                 | Large                                              |
|                         | AC           | 180.073                                            | .686                                                 | Large                                              |
|                         | AI           | 96.226                                             | .501                                                 | Large                                              |
|                         | IC           | 1.703 <sup>NS</sup>                                | .067                                                 | Not Significant                                    |
|                         | II           | 69.973                                             | .427                                                 | Medium                                             |
|                         | AB           | 103.691                                            | .52                                                  | Large                                              |
| <b>Sandwich</b>         | MC Composite | 110.683                                            | .538                                                 | Large                                              |
|                         | MC Attempts  | 68.562                                             | .423                                                 | Medium                                             |
|                         | AC           | 176.41                                             | .679                                                 | Large                                              |
|                         | AI           | 69.462                                             | .426                                                 | Medium                                             |
|                         | IC           | 3.44 <sup>NS</sup>                                 | .095                                                 | Not Significant                                    |
|                         | II           | 62.5                                               | .404                                                 | Medium                                             |
|                         | AB           | 59.687                                             | .395                                                 | Medium                                             |
| <b>Cat Rescue</b>       | MC Composite | 136.990                                            | .598                                                 | Large                                              |
|                         | MC Attempts  | 83.114                                             | .466                                                 | Medium                                             |
|                         | AC           | 183.564                                            | .692                                                 | Large                                              |
|                         | AI           | 87.075                                             | .477                                                 | Medium                                             |
|                         | IC           | 49.168                                             | .358                                                 | Medium                                             |
|                         | II           | 20.060                                             | .229                                                 | Small                                              |
|                         | AB           | 93.733                                             | .495                                                 | Medium                                             |
| <b>Refused Umbrella</b> | MC Composite | 148.484                                            | .623                                                 | Large                                              |
|                         | MC Attempts  | 119.996                                            | .56                                                  | Large                                              |
|                         | AC           | 186.91                                             | .699                                                 | Large                                              |
|                         | AI           | 46.526                                             | .349                                                 | Medium                                             |
|                         | IC           | 27.487                                             | .268                                                 | Small                                              |
|                         | II           | 16.994                                             | .211                                                 | Small                                              |
|                         | AB           | 107.987                                            | .531                                                 | Large                                              |

Notes. MC = main concept; AC = accurate/complete; AI = accurate/incomplete; IC = inaccurate/complete; II = inaccurate/incomplete; AB= absent.

<sup>†</sup>Comparisons are significant at  $p < .001$  unless noted otherwise.

<sup>NS</sup> $p > .05$ . <sup>†</sup>Nonsignificant with Holm-Bonferroni correction.
