# Supplementary material
Source: publisher figshare collection journal article supplement (https://asha.figshare.com/articles/dataset/_/7485647)
Supplement: Supplementary file 10 [file 1]

**Supplemental Material S13.** Correlation of number of absent (AB) codes across the five discourse tasks.

**Correlations**

|     |                     | CIN    | CR     | PBJ    | RU     | BW     |
|-----|---------------------|--------|--------|--------|--------|--------|
| CIN | Pearson Correlation | 1      | .669** | .590** | .695** | .610** |
|     | Sig. (2-tailed)     |        | .000   | .000   | .000   | .000   |
|     | N                   | 383    | 383    | 383    | 383    | 383    |
| CR  | Pearson Correlation | .669** | 1      | .510** | .695** | .654** |
|     | Sig. (2-tailed)     | .000   |        | .000   | .000   | .000   |
|     | N                   | 383    | 383    | 383    | 383    | 383    |
| PBJ | Pearson Correlation | .590** | .510** | 1      | .557** | .448** |
|     | Sig. (2-tailed)     | .000   | .000   |        | .000   | .000   |
|     | N                   | 383    | 383    | 383    | 383    | 383    |
| RU  | Pearson Correlation | .695** | .695** | .557** | 1      | .615** |
|     | Sig. (2-tailed)     | .000   | .000   | .000   |        | .000   |
|     | N                   | 383    | 383    | 383    | 383    | 383    |
| BW  | Pearson Correlation | .610** | .654** | .448** | .615** | 1      |
|     | Sig. (2-tailed)     | .000   | .000   | .000   | .000   |        |
|     | N                   | 383    | 383    | 383    | 383    | 383    |

\*\* . Correlation is significant at the 0.01 level (2-tailed).

*Note.* CIN = Cinderella; CR = Cat Rescue; PBJ = Sandwich; RU = Refused Umbrella; BW = Broken Window.
