# Supplementary material
Source: publisher figshare collection journal article supplement (https://asha.figshare.com/articles/dataset/_/7485647)
Supplement: Supplementary file 11 [file 1]

**Supplemental Material S8.** Correlation of main concept (MC) composite scores across the five discourse tasks.

|     |                     | <b>Correlations</b> |                    |                    |                    |                    |
|-----|---------------------|---------------------|--------------------|--------------------|--------------------|--------------------|
|     |                     | CIN                 | CR                 | PBJ                | RU                 | BW                 |
| CIN | Pearson Correlation | 1                   | .753 <sup>**</sup> | .702 <sup>**</sup> | .757 <sup>**</sup> | .721 <sup>**</sup> |
|     | Sig. (2-tailed)     |                     | .000               | .000               | .000               | .000               |
|     | N                   | 383                 | 383                | 383                | 383                | 383                |
| CR  | Pearson Correlation | .753 <sup>**</sup>  | 1                  | .664 <sup>**</sup> | .765 <sup>**</sup> | .760 <sup>**</sup> |
|     | Sig. (2-tailed)     | .000                |                    | .000               | .000               | .000               |
|     | N                   | 383                 | 383                | 383                | 383                | 383                |
| PBJ | Pearson Correlation | .702 <sup>**</sup>  | .664 <sup>**</sup> | 1                  | .693 <sup>**</sup> | .603 <sup>**</sup> |
|     | Sig. (2-tailed)     | .000                | .000               |                    | .000               | .000               |
|     | N                   | 383                 | 383                | 383                | 383                | 383                |
| RU  | Pearson Correlation | .757 <sup>**</sup>  | .765 <sup>**</sup> | .693 <sup>**</sup> | 1                  | .723 <sup>**</sup> |
|     | Sig. (2-tailed)     | .000                | .000               | .000               |                    | .000               |
|     | N                   | 383                 | 383                | 383                | 383                | 383                |
| BW  | Pearson Correlation | .721 <sup>**</sup>  | .760 <sup>**</sup> | .603 <sup>**</sup> | .723 <sup>**</sup> | 1                  |
|     | Sig. (2-tailed)     | .000                | .000               | .000               | .000               |                    |
|     | N                   | 383                 | 383                | 383                | 383                | 383                |

<sup>\*\*</sup>. Correlation is significant at the 0.01 level (2-tailed).

*Note.* CIN = Cinderella; CR = Cat Rescue; PBJ = Sandwich; RU = Refused Umbrella; BW = Broken Window.
