# Supplementary material
Source: publisher figshare collection journal article supplement (https://asha.figshare.com/articles/dataset/_/7485647)
Supplement: Supplementary file 12 [file 1]

**Supplemental Material S3.** Comparison median tests comparing all individuals with anomic aphasia to all controls for the five discourse tasks.<sup>†</sup>

|                         |              | Median Test<br>( $\chi^2$ ) | Phi Coefficient<br>( $\phi$ ) | Phi ( $\phi$ )<br>Magnitude |
|-------------------------|--------------|-----------------------------|-------------------------------|-----------------------------|
| <b>Broken Window</b>    | MC Composite | 52.595                      | .477                          | Large                       |
|                         | MC Attempts  | 31.413                      | .369                          | Large                       |
|                         | AC           | 82.5                        | .598                          | Medium                      |
|                         | AI           | 86.354                      | .611                          | Small                       |
|                         | IC           | 35.014                      | .389                          | Medium                      |
|                         | II           | 13.972                      | .246                          | Medium                      |
|                         | AB           | 25.854                      | .335                          | Medium                      |
| <b>Cinderella</b>       | MC Composite | 66.92                       | .538                          | Large                       |
|                         | MC Attempts  | 44.106                      | .454                          | Medium                      |
|                         | AC           | 104.109                     | .671                          | Large                       |
|                         | AI           | 82.901                      | .599                          | Large                       |
|                         | IC           | 9.015**                     | .198                          | Small                       |
|                         | II           | 49.425                      | .463                          | Medium                      |
|                         | AB           | 52.806                      | .478                          | Medium                      |
| <b>Sandwich</b>         | MC Composite | 49.474                      | .463                          | Medium                      |
|                         | MC Attempts  | 26.278                      | .337                          | Medium                      |
|                         | AC           | 93.568                      | .636                          | Large                       |
|                         | AI           | 53.974                      | .483                          | Medium                      |
|                         | IC           | 16.557                      | .268                          | Small                       |
|                         | II           | 33.963                      | .383                          | Medium                      |
|                         | AB           | 24.253                      | .324                          | Medium                      |
| <b>Cat Rescue</b>       | MC Composite | 73.393                      | .564                          | Large                       |
|                         | MC Attempts  | 37.155                      | .401                          | Medium                      |
|                         | AC           | 102.634                     | .667                          | Large                       |
|                         | AI           | 61.946                      | .518                          | Large                       |
|                         | IC           | 48.701                      | .459                          | Medium                      |
|                         | II           | 5.603 <sup>T</sup>          | .156                          | Small                       |
|                         | AB           | 45.47                       | .444                          | Medium                      |
| <b>Refused Umbrella</b> | MC Composite | 88.041                      | .617                          | Large                       |
|                         | MC Attempts  | 84.485                      | .605                          | Large                       |
|                         | AC           | 108.418                     | .685                          | Large                       |
|                         | AI           | 6.725 <sup>T</sup>          | .171                          | Small                       |
|                         | IC           | 31.245                      | .368                          | Medium                      |
|                         | II           | 10.386                      | .212                          | Small                       |
|                         | AB           | 69.354                      | .548                          | Large                       |

Notes. MC = main concept; AC = accurate/complete; AI = accurate/incomplete; IC = inaccurate/complete; II = inaccurate/incomplete; AB= absent.

<sup>†</sup>All comparisons are significant at  $p < .001$ , unless noted otherwise.

\*\*  $p > .01$ . <sup>NS</sup>  $p > .05$ . <sup>T</sup>Nonsignificant with Holm-Bonferroni correction.
