# Supplementary material
Source: publisher figshare collection journal article supplement (https://asha.figshare.com/articles/dataset/_/7485647)
Supplement: Supplementary file 13 [file 1]

**Supplemental Material S4.** Comparison median tests comparing all individuals with conduction aphasia to all controls for the five discourse tasks.<sup>†</sup>

|                         |              | <b>Median Test</b><br><b>(<math>\chi^2</math>)</b> | <b>Phi Coefficient</b><br><b>(<math>\phi</math>)</b> | <b>Phi (<math>\phi</math>)</b><br><b>Magnitude</b> |
|-------------------------|--------------|----------------------------------------------------|------------------------------------------------------|----------------------------------------------------|
| <b>Broken Window</b>    | MC Composite | 59.347                                             | .557                                                 | Large                                              |
|                         | MC Attempts  | 26.708                                             | .374                                                 | Medium                                             |
|                         | AC           | 89.222                                             | .683                                                 | Large                                              |
|                         | AI           | 111.291                                            | .763                                                 | Large                                              |
|                         | IC           | 58.343                                             | .553                                                 | Large                                              |
|                         | II           | 9.607**                                            | .224                                                 | Small                                              |
|                         | AB           | 14.121                                             | .272                                                 | Small                                              |
| <b>Cinderella</b>       | MC Composite | 58.486                                             | .553                                                 | Large                                              |
|                         | MC Attempts  | 39.282                                             | .454                                                 | Medium                                             |
|                         | AC           | 109.877                                            | .758                                                 | Large                                              |
|                         | AI           | 56.126                                             | .542                                                 | Large                                              |
|                         | IC           | 2.647 <sup>NS</sup>                                | .118                                                 | Small                                              |
|                         | II           | 89.455                                             | .684                                                 | Large                                              |
|                         | AB           | 49.339                                             | .508                                                 | Large                                              |
| <b>Sandwich</b>         | MC Composite | 63.924                                             | .579                                                 | Large                                              |
|                         | MC Attempts  | 33.552                                             | .419                                                 | Medium                                             |
|                         | AC           | 105.572                                            | .743                                                 | Large                                              |
|                         | AI           | 45.129                                             | .486                                                 | Medium                                             |
|                         | IC           | 0.241 <sup>NS</sup>                                | .036                                                 | Not Significant                                    |
|                         | II           | 84.876                                             | .667                                                 | Large                                              |
|                         | AB           | 22.717                                             | .345                                                 | Medium                                             |
| <b>Cat Rescue</b>       | MC Composite | 56.208                                             | .542                                                 | Large                                              |
|                         | MC Attempts  | 20.953                                             | .331                                                 | Medium                                             |
|                         | AC           | 91.768                                             | .693                                                 | Large                                              |
|                         | AI           | 78.208                                             | .64                                                  | Large                                              |
|                         | IC           | 76.24                                              | .632                                                 | Large                                              |
|                         | II           | 50.06                                              | .512                                                 | Large                                              |
|                         | AB           | 32.182                                             | .41                                                  | Medium                                             |
| <b>Refused Umbrella</b> | MC Composite | 65.563                                             | .586                                                 | Large                                              |
|                         | MC Attempts  | 42.43                                              | .471                                                 | Medium                                             |
|                         | AC           | 108.332                                            | .753                                                 | Large                                              |
|                         | AI           | 55.637                                             | .54                                                  | Large                                              |
|                         | IC           | 38.862                                             | .451                                                 | Medium                                             |
|                         | II           | 26.32                                              | .371                                                 | Medium                                             |
|                         | AB           | 58.26                                              | .552                                                 | Large                                              |

Notes. MC = main concept; AC = accurate/complete; AI = accurate/incomplete; IC = inaccurate/complete; II = inaccurate/incomplete; AB= absent.

<sup>†</sup>Comparisons are significant at  $p < .001$  unless noted otherwise.

\*\*  $p > .01$ . <sup>NS</sup>  $p > .05$ . <sup>T</sup>Nonsignificant with Holm-Bonferroni correction.
