# Supplementary material
Source: publisher figshare collection journal article supplement (https://asha.figshare.com/articles/dataset/_/7485647)
Supplement: Supplementary file 14 [file 1]

**Supplemental Material S10.** Correlation of number of accurate/incomplete (AI) codes across the five discourse tasks.

**Correlations**

|     |                     | CIN                | CR                 | PBJ                | RU                 | BW                 |
|-----|---------------------|--------------------|--------------------|--------------------|--------------------|--------------------|
| CIN | Pearson Correlation | 1                  | .352 <sup>**</sup> | .395 <sup>**</sup> | .392 <sup>**</sup> | .452 <sup>**</sup> |
|     | Sig. (2-tailed)     |                    | .000               | .000               | .000               | .000               |
|     | N                   | 383                | 383                | 383                | 383                | 383                |
| CR  | Pearson Correlation | .352 <sup>**</sup> | 1                  | .408 <sup>**</sup> | .558 <sup>**</sup> | .551 <sup>**</sup> |
|     | Sig. (2-tailed)     | .000               |                    | .000               | .000               | .000               |
|     | N                   | 383                | 383                | 383                | 383                | 383                |
| PBJ | Pearson Correlation | .395 <sup>**</sup> | .408 <sup>**</sup> | 1                  | .385 <sup>**</sup> | .436 <sup>**</sup> |
|     | Sig. (2-tailed)     | .000               | .000               |                    | .000               | .000               |
|     | N                   | 383                | 383                | 383                | 383                | 383                |
| RU  | Pearson Correlation | .392 <sup>**</sup> | .558 <sup>**</sup> | .385 <sup>**</sup> | 1                  | .580 <sup>**</sup> |
|     | Sig. (2-tailed)     | .000               | .000               | .000               |                    | .000               |
|     | N                   | 383                | 383                | 383                | 383                | 383                |
| BW  | Pearson Correlation | .452 <sup>**</sup> | .551 <sup>**</sup> | .436 <sup>**</sup> | .580 <sup>**</sup> | 1                  |
|     | Sig. (2-tailed)     | .000               | .000               | .000               | .000               |                    |
|     | N                   | 383                | 383                | 383                | 383                | 383                |

\*\* . Correlation is significant at the 0.01 level (2-tailed).

*Note.* CIN = Cinderella; CR = Cat Rescue; PBJ = Sandwich; RU = Refused Umbrella; BW = Broken Window.
